# Supplementary material for: HLA-DPA1 overexpression inhibits cancer progression, reduces resistance to cisplatin, and correlates with increased immune infiltration in lung adenocarcinoma
Source: publisher site journal article supplement (doi:10.18632/aging.205082), 2023-10-27
Supplement: Supplementary file [file aging-v15i20-205082-supplementary-material-SD1.pdf]

**SUPPLEMENTARY FIGURES**

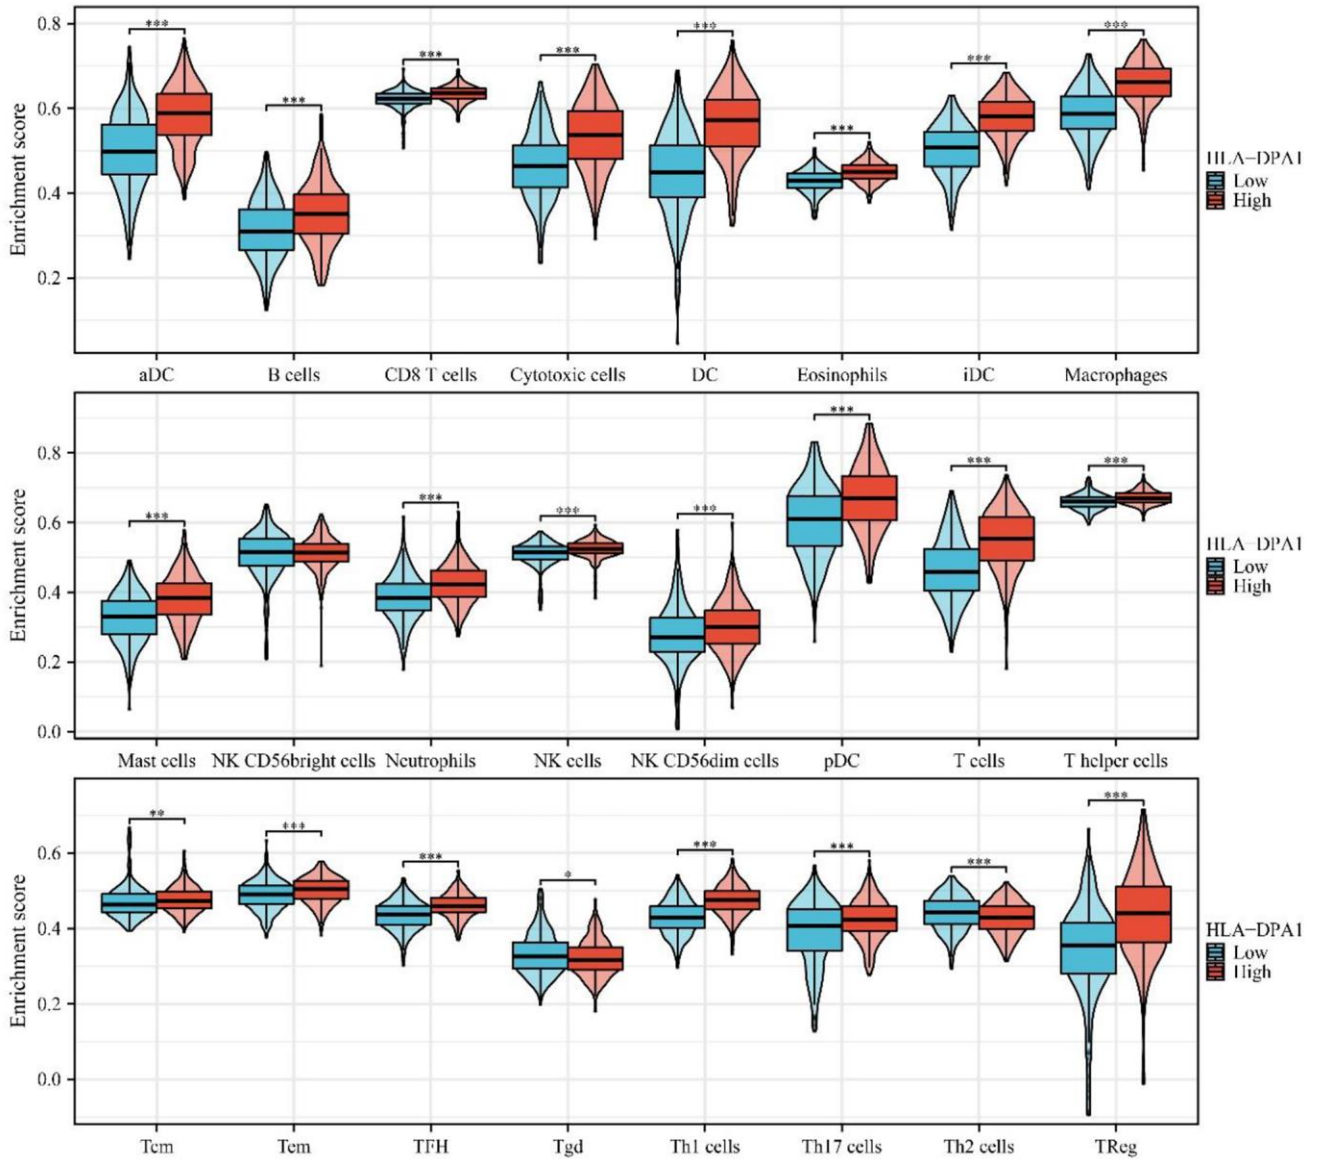

**Supplementary Figure 1. The immune cells in high- and low-HLA-DPA1 expression groups.**

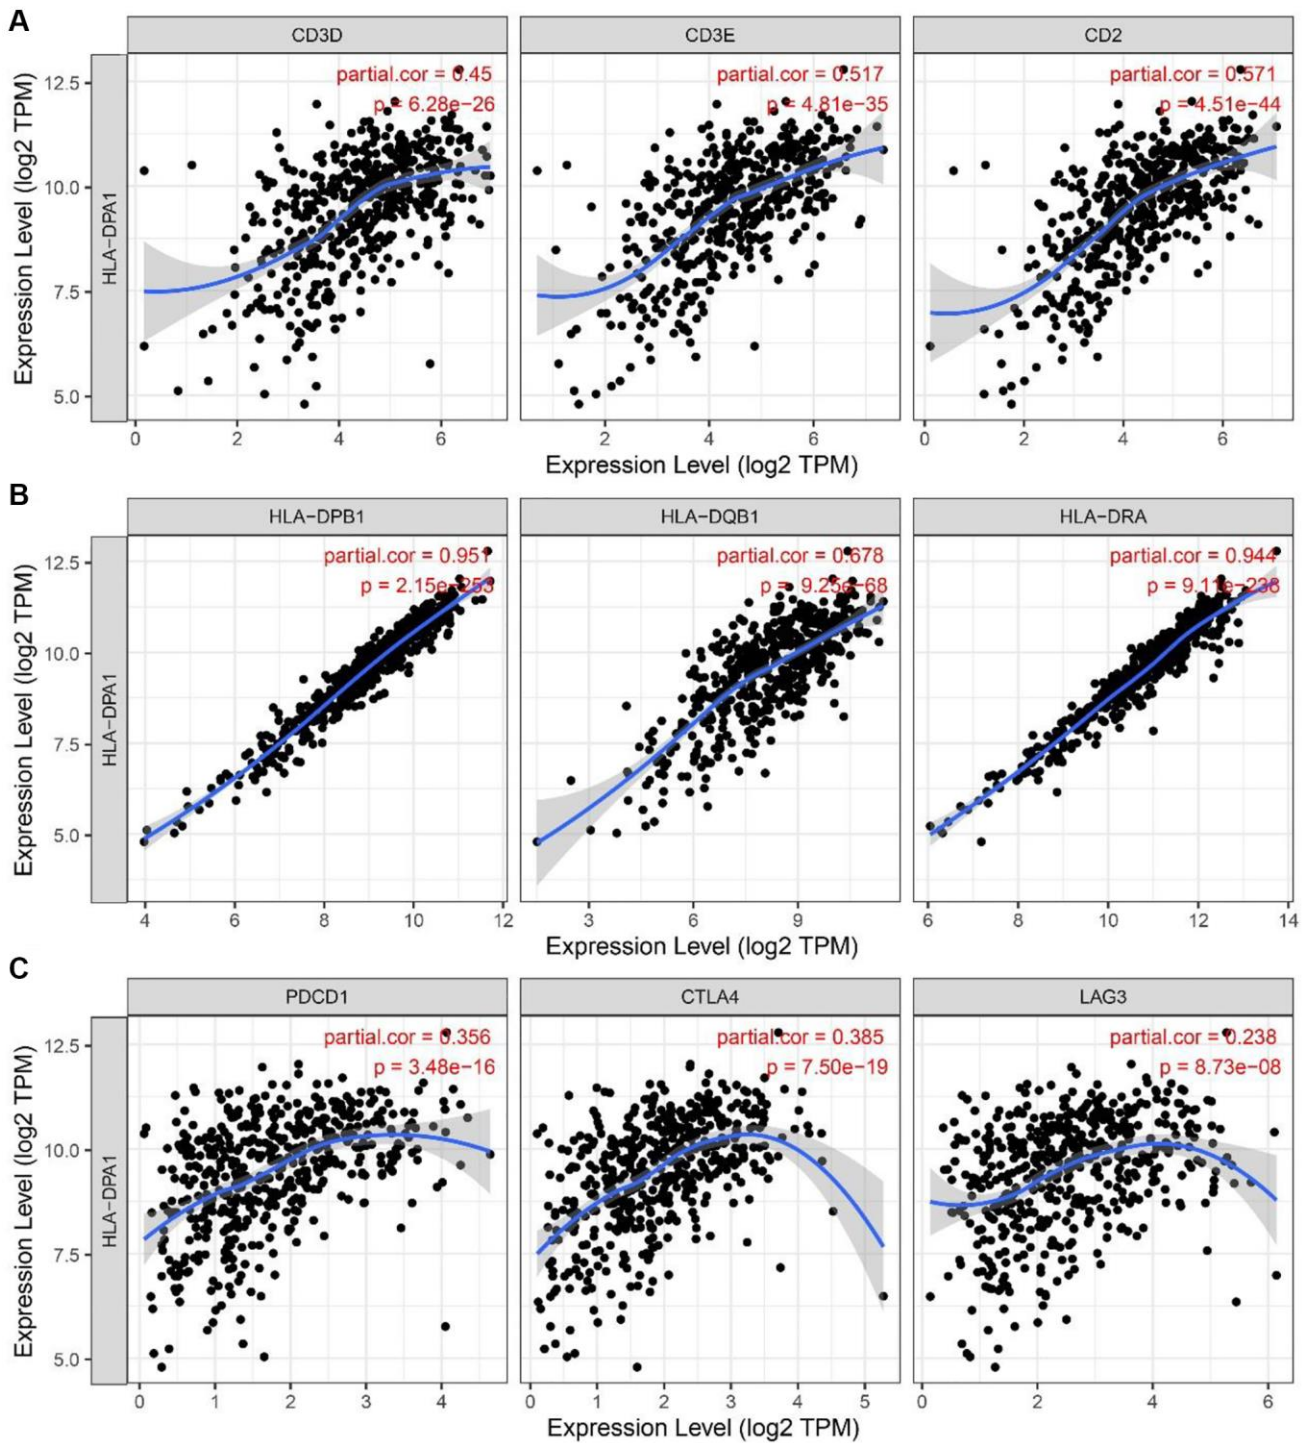

**Supplementary Figure 2. The correlation between the HLA-DPA1 overexpression and immune cell markers in the context of tumor purity. (A) T cell markers; (B) Dendritic cell markers; (C) T cell exhaustion markers.**
