# Supplementary material for: HLA-DPA1 overexpression inhibits cancer progression, reduces resistance to cisplatin, and correlates with increased immune infiltration in lung adenocarcinoma
Source: publisher site journal article supplement (doi:10.18632/aging.205082), 2023-10-27
Supplement: Supplementary file [file aging-v15i20-205082-supplementary-material-SD2.pdf]

## SUPPLEMENTARY TABLES

**Supplementary Table 1. Genes positively co-expressed with HLA-DPA1.**

| Gene      | Coefficient | Gene     | Coefficient | Gene     | Coefficient | Gene     | Coefficient |
|-----------|-------------|----------|-------------|----------|-------------|----------|-------------|
| HLA-DPA1  | 1           | GIMAP2   | 0.709154362 | IL10RA   | 0.665266461 | B2M      | 0.629901396 |
| HLA-DRA   | 0.939929272 | IRF8     | 0.707679199 | FGR      | 0.663879355 | HVCN1    | 0.628828632 |
| HLA-DPB1  | 0.923988098 | FCER1G   | 0.707343115 | IL16     | 0.662454606 | APBB1IP  | 0.628491844 |
| CD74      | 0.899900908 | LCP1     | 0.706873538 | RAC2     | 0.661552796 | APOBEC3G | 0.628477428 |
| HLA-DMB   | 0.89516136  | WAS      | 0.706465797 | CD40     | 0.656945302 | PLD4     | 0.628209624 |
| HLA-DRB1  | 0.894503912 | FOLR2    | 0.706257982 | STX11    | 0.656687429 | GNGT2    | 0.627258125 |
| HLA-DOA   | 0.884142667 | HCK      | 0.705229462 | ADORA3   | 0.656329789 | SLC7A7   | 0.62652732  |
| HLA-DQA1  | 0.865189432 | TLR7     | 0.70445824  | VSIG4    | 0.655937383 | TRAC     | 0.626121154 |
| HLA-DMA   | 0.847758139 | EVI2B    | 0.70403413  | AOAH     | 0.655612225 | PLAAT4   | 0.625453196 |
| HLA-DRB5  | 0.81288267  | HLA-B    | 0.703761948 | GPR65    | 0.655318311 | CXorf21  | 0.625009856 |
| CD4       | 0.797077423 | JAML     | 0.702048268 | CCR5     | 0.65510061  | HLA-DRB9 | 0.624574107 |
| HLA-DQB1  | 0.796030118 | GMFG     | 0.70015895  | CMKLR1   | 0.654985087 | CSF2RA   | 0.624137366 |
| ITGB2     | 0.788547922 | MPEG1    | 0.698885411 | SIGLEC7  | 0.65427375  | PIK3R6   | 0.623917277 |
| LY86      | 0.785160735 | SIGLEC9  | 0.698402631 | ARHGDI1  | 0.653929457 | PTPRO    | 0.623299519 |
| MNDA      | 0.783246088 | NAPSB    | 0.69803603  | NCF2     | 0.652792325 | SLC37A2  | 0.622955534 |
| AIF1      | 0.772757553 | C1QC     | 0.695624592 | ALOX5AP  | 0.652546315 | PTGER4   | 0.621546807 |
| TNFAIP8L2 | 0.766436301 | CD300C   | 0.695043028 | APOL3    | 0.652251108 | TRAV9-2  | 0.621295947 |
| BTK       | 0.764783007 | TREM2    | 0.694295369 | CSF2RB   | 0.651149346 | HPGDS    | 0.621078907 |
| SASH3     | 0.759361863 | ITGAM    | 0.693786636 | BIN2     | 0.650272112 | LAT2     | 0.619846708 |
| RNASE6    | 0.758584752 | LCP2     | 0.693319357 | CCR2     | 0.649746926 | PTAFR    | 0.619758083 |
| LST1      | 0.757025543 | C1QB     | 0.693105046 | FCGR2A   | 0.649034746 | GIMAP7   | 0.619382155 |
| SNX20     | 0.756369058 | ABI3     | 0.69262654  | TESPA1   | 0.648898786 | GIMAP1   | 0.618293486 |
| SELPLG    | 0.75520627  | CD83     | 0.69206892  | CPVL     | 0.648893369 | DPYD     | 0.617323461 |
| CASP1     | 0.754163424 | P2RX7    | 0.691813207 | MSR1     | 0.648375003 | LIPA     | 0.61652342  |
| HLA-E     | 0.753729746 | CTSS     | 0.691611696 | TRBV20-1 | 0.647268782 | SUSD3    | 0.61648575  |
| LAPTM5    | 0.753479911 | GIMAP4   | 0.688455211 | SIGLEC1  | 0.645604697 | GAPT     | 0.61581821  |
| MS4A6A    | 0.752081068 | P2RY12   | 0.687804712 | STAT5A   | 0.645207313 | CTSO     | 0.615547705 |
| NCKAP1L   | 0.751531026 | ARHGEF6  | 0.684457645 | GIMAP6   | 0.644978996 | GPR34    | 0.615511763 |
| NCF4      | 0.750258443 | C1QA     | 0.683927379 | PIK3AP1  | 0.64456783  | SLC9A9   | 0.612763332 |
| CSF1R     | 0.749004745 | FPR3     | 0.683479884 | TRPV2    | 0.643274177 | PTPN7    | 0.612669918 |
| CD33      | 0.745531105 | PILRA    | 0.683236633 | RASGRP4  | 0.642443942 | GAB3     | 0.611165095 |
| LAIR1     | 0.745137597 | TRIM22   | 0.682640635 | PPM1M    | 0.64024745  | SIRPA    | 0.610996844 |
| DOK2      | 0.743745445 | PLEKHO2  | 0.68236022  | CD2      | 0.639726955 | BTN2A2   | 0.610550918 |
| IGSF6     | 0.742384755 | TNFSF13B | 0.682305822 | MS4A7    | 0.639638351 | CD14     | 0.610491259 |
| HAVCR2    | 0.741026835 | FERMT3   | 0.681442247 | VAV1     | 0.639063669 | TNFRSF1B | 0.609933332 |
| SPN       | 0.740607311 | CARD16   | 0.680719773 | ARHGAP25 | 0.638706387 | SOWAHD   | 0.60992759  |
| PLEK      | 0.739850317 | MYO1F    | 0.680453501 | PIK3R5   | 0.638646893 | NLRP3    | 0.609720717 |
| C1orf162  | 0.736860456 | MS4A4A   | 0.679303416 | FGL2     | 0.637921546 | SIRPB2   | 0.609692421 |
| CD53      | 0.734130409 | ARHGAP30 | 0.678961328 | IL12RB1  | 0.637371434 | GLIPR2   | 0.608938195 |
| SPI1      | 0.733722089 | CYTH4    | 0.678864793 | CD48     | 0.637292106 | LYZ      | 0.607803012 |
| CIITA     | 0.733256993 | SLAMF8   | 0.67822393  | DPEP2    | 0.636755608 | PLXNC1   | 0.606206182 |
| CLEC10A   | 0.7311992   | TMEM273  | 0.676954861 | FCGR3A   | 0.636637542 | RGS18    | 0.605792372 |
| NFAM1     | 0.728820941 | LRRC25   | 0.676003165 | IKZF1    | 0.636397279 | ARHGAP15 | 0.605765121 |

|          |             |         |             |          |             |          |             |
|----------|-------------|---------|-------------|----------|-------------|----------|-------------|
| P2RY13   | 0.728515817 | DOCK2   | 0.675190718 | RTN1     | 0.635615729 | PIK3CG   | 0.605572854 |
| LPXN     | 0.728140858 | FGD2    | 0.675172682 | C16orf54 | 0.634502003 | ACP5     | 0.605251514 |
| HLA-DQB2 | 0.726972607 | TLR2    | 0.674083278 | FAM78A   | 0.634174009 | RCSD1    | 0.604741018 |
| CD300LF  | 0.726079309 | BTN3A3  | 0.673399207 | OLR1     | 0.633164644 | APOBEC3C | 0.604032018 |
| C3AR1    | 0.726078036 | TLR8    | 0.672881567 | OSCAR    | 0.632783049 | CD1C     | 0.603010184 |
| CD86     | 0.725319008 | PARVG   | 0.671433867 | DOCK8    | 0.631741926 | ARHGAP9  | 0.602774842 |
| GGTA1    | 0.723482082 | PTPRC   | 0.670614401 | FCGR1A   | 0.631655081 | GPNMB    | 0.602568483 |
| CYBB     | 0.722112758 | TAGAP   | 0.670340181 | SLA      | 0.631621015 | HCST     | 0.602329332 |
| SLC15A3  | 0.720823718 | LSP1    | 0.670221883 | CRTAM    | 0.631082981 | TRBV19   | 0.601083604 |
| CD37     | 0.718415678 | ALOX5   | 0.669901347 | HLA-F    | 0.630999906 | NRROS    | 0.600937344 |
| CD52     | 0.71295562  | ITGAL   | 0.668225928 | LILRB1   | 0.630278903 | NCF1     | 0.600869284 |
| SCIMP    | 0.711263816 | CD84    | 0.6679874   | MRC1     | 0.630169002 | PSTPIP1  | 0.6008261   |
| SLCO2B1  | 0.710385258 | HLA-DOB | 0.667899962 | CLEC7A   | 0.630093914 | LGALS9   | 0.600292892 |
| TYROBP   | 0.709641209 | SAMHD1  | 0.666470219 | PTPN22   | 0.630090261 | TRAV8-2  | 0.600056566 |
| CLECL1   | 0.6000455   |         |             |          |             |          |             |

**Supplementary Table 3. The biological functions of HLA-DPA1 using GO analysis in the TISIDB database.**

| GO type | Term                                                                                                 |
|---------|------------------------------------------------------------------------------------------------------|
| BP      | GO:0001819 positive regulation of cytokine production                                                |
| BP      | GO:0002429 immune response-activating cell surface receptor signaling pathway                        |
| BP      | GO:0002478 antigen processing and presentation of exogenous peptide antigen                          |
| BP      | GO:0002495 antigen processing and presentation of peptide antigen via MHC class II                   |
| BP      | GO:0002504 antigen processing and presentation of peptide or polysaccharide antigen via MHC class II |
| BP      | GO:0002694 regulation of leukocyte activation                                                        |
| BP      | GO:0002696 positive regulation of leukocyte activation                                               |
| BP      | GO:0002757 immune response-activating signal transduction                                            |
| BP      | GO:0002764 immune response-regulating signaling pathway                                              |
| BP      | GO:0002768 immune response-regulating cell surface receptor signaling pathway                        |
| BP      | GO:0007159 leukocyte cell-cell adhesion                                                              |
| BP      | GO:0019882 antigen processing and presentation                                                       |
| BP      | GO:0019884 antigen processing and presentation of exogenous antigen                                  |
| BP      | GO:0019886 antigen processing and presentation of exogenous peptide antigen via MHC class II         |
| BP      | GO:0022407 regulation of cell-cell adhesion                                                          |
| BP      | GO:0022409 positive regulation of cell-cell adhesion                                                 |
| BP      | GO:0031294 lymphocyte costimulation                                                                  |
| BP      | GO:0031295 T cell costimulation                                                                      |
| BP      | GO:0032609 interferon-gamma production                                                               |
| BP      | GO:0032649 regulation of interferon-gamma production                                                 |
| BP      | GO:0032729 positive regulation of interferon-gamma production                                        |
| BP      | GO:0032943 mononuclear cell proliferation                                                            |
| BP      | GO:0032944 regulation of mononuclear cell proliferation                                              |
| BP      | GO:0032946 positive regulation of mononuclear cell proliferation                                     |
| BP      | GO:0034341 response to interferon-gamma                                                              |
| BP      | GO:0042098 T cell proliferation                                                                      |
| BP      | GO:0042102 positive regulation of T cell proliferation                                               |
| BP      | GO:0042110 T cell activation                                                                         |

---

|    |                                                                   |
|----|-------------------------------------------------------------------|
| BP | GO:0042129 regulation of T cell proliferation                     |
| BP | GO:0045785 positive regulation of cell adhesion                   |
| BP | GO:0046651 lymphocyte proliferation                               |
| BP | GO:0048002 antigen processing and presentation of peptide antigen |
| BP | GO:0050670 regulation of lymphocyte proliferation                 |
| BP | GO:0050671 positive regulation of lymphocyte proliferation        |
| BP | GO:0050851 antigen receptor-mediated signaling pathway            |
| BP | GO:0050852 T cell receptor signaling pathway                      |
| BP | GO:0050863 regulation of T cell activation                        |
| BP | GO:0050865 regulation of cell activation                          |
| BP | GO:0050867 positive regulation of cell activation                 |
| BP | GO:0050870 positive regulation of T cell activation               |
| BP | GO:0051249 regulation of lymphocyte activation                    |
| BP | GO:0051251 positive regulation of lymphocyte activation           |
| BP | GO:0060333 interferon-gamma-mediated signaling pathway            |
| BP | GO:0070486 leukocyte aggregation                                  |
| BP | GO:0070489 T cell aggregation                                     |
| BP | GO:0070661 leukocyte proliferation                                |
| BP | GO:0070663 regulation of leukocyte proliferation                  |
| BP | GO:0070665 positive regulation of leukocyte proliferation         |
| BP | GO:0071346 cellular response to interferon-gamma                  |
| BP | GO:0071593 lymphocyte aggregation                                 |
| BP | GO:1903037 regulation of leukocyte cell-cell adhesion             |
| BP | GO:1903039 positive regulation of leukocyte cell-cell adhesion    |
| MF | GO:0003823 antigen binding                                        |
| MF | GO:0032395 MHC class II receptor activity                         |
| MF | GO:0033218 amide binding                                          |
| MF | GO:0042277 peptide binding                                        |
| MF | GO:0042605 peptide antigen binding                                |
| CC | GO:0005765 lysosomal membrane                                     |
| CC | GO:0005802 trans-Golgi network                                    |
| CC | GO:0010008 endosome membrane                                      |
| CC | GO:0012507 ER to Golgi transport vesicle membrane                 |
| CC | GO:0030133 transport vesicle                                      |
| CC | GO:0030134 ER to Golgi transport vesicle                          |
| CC | GO:0030135 coated vesicle                                         |
| CC | GO:0030136 clathrin-coated vesicle                                |
| CC | GO:0030139 endocytic vesicle                                      |
| CC | GO:0030176 integral component of endoplasmic reticulum membrane   |
| CC | GO:0030658 transport vesicle membrane                             |
| CC | GO:0030659 cytoplasmic vesicle membrane                           |
| CC | GO:0030662 coated vesicle membrane                                |
| CC | GO:0030665 clathrin-coated vesicle membrane                       |
| CC | GO:0030666 endocytic vesicle membrane                             |
| CC | GO:0030669 clathrin-coated endocytic vesicle membrane             |
| CC | GO:0031227 intrinsic component of endoplasmic reticulum membrane  |
| CC | GO:0031984 organelle subcompartment                               |

---

---

|    |                                                                                 |
|----|---------------------------------------------------------------------------------|
| CC | GO:0032588 trans-Golgi network membrane                                         |
| CC | GO:0042611 MHC protein complex                                                  |
| CC | GO:0042613 MHC class II protein complex                                         |
| CC | GO:0044440 endosomal part                                                       |
| CC | GO:0045334 clathrin-coated endocytic vesicle                                    |
| CC | GO:0071556 integral component of luminal side of endoplasmic reticulum membrane |
| CC | GO:0098552 side of membrane                                                     |
| CC | GO:0098553 luminal side of endoplasmic reticulum membrane                       |
| CC | GO:0098791 Golgi subcompartment                                                 |
| CC | GO:0098852 lytic vacuole membrane                                               |

---

Abbreviations: GO: gene ontology; BP: biological process; MF: molecular function; CC: cellular component.
